# Supplementary material for: Extensive regulation of enzyme activity by phosphorylation in Escherichia coli
Source: PubMed Central journal article supplement (PMC8463566; doi:10.1038/s41467-021-25988-4), 2021-09-24
Supplement: 41467_2021_25988_MOESM1_ESM.pdf [file 41467_2021_25988_MOESM1_ESM.pdf]

Supplementary Information for

**“Extensive regulation of enzyme activity by phosphorylation in *Escherichia coli*”.**

Schastnaya et al.

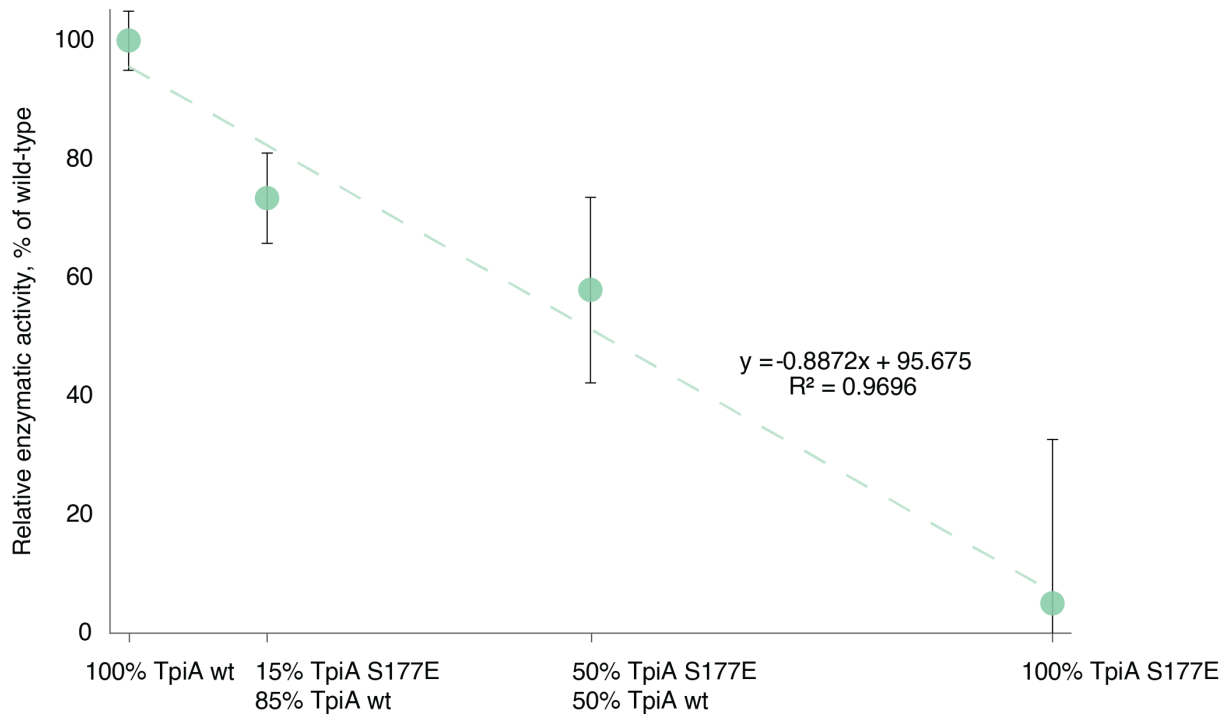

**Supplementary Figure 1 | The influence of mimicking TpiA S177 phosphosite occupancy on enzymatic activity.** Enzymatic activities of four samples with different ratios between the unphosphorylated wild-type (TpiA wt) and S177E phosphomimicking mutant (TpiA S177E), approximating 0, 15, 50, and 100% occupancy of S177 phosphorylation site. The activity values were normalized to the sample containing 100% TpiA wild-type. The substrate concentration was 1 mM dihydroxyacetone phosphate. Data represent the mean  $\pm$  standard deviation. The number of independent replicates over two experiments was six for 100% TpiA wt, seven for mixed samples, and four for 100% TpiA S177E. Source data are provided as a Source Data file.

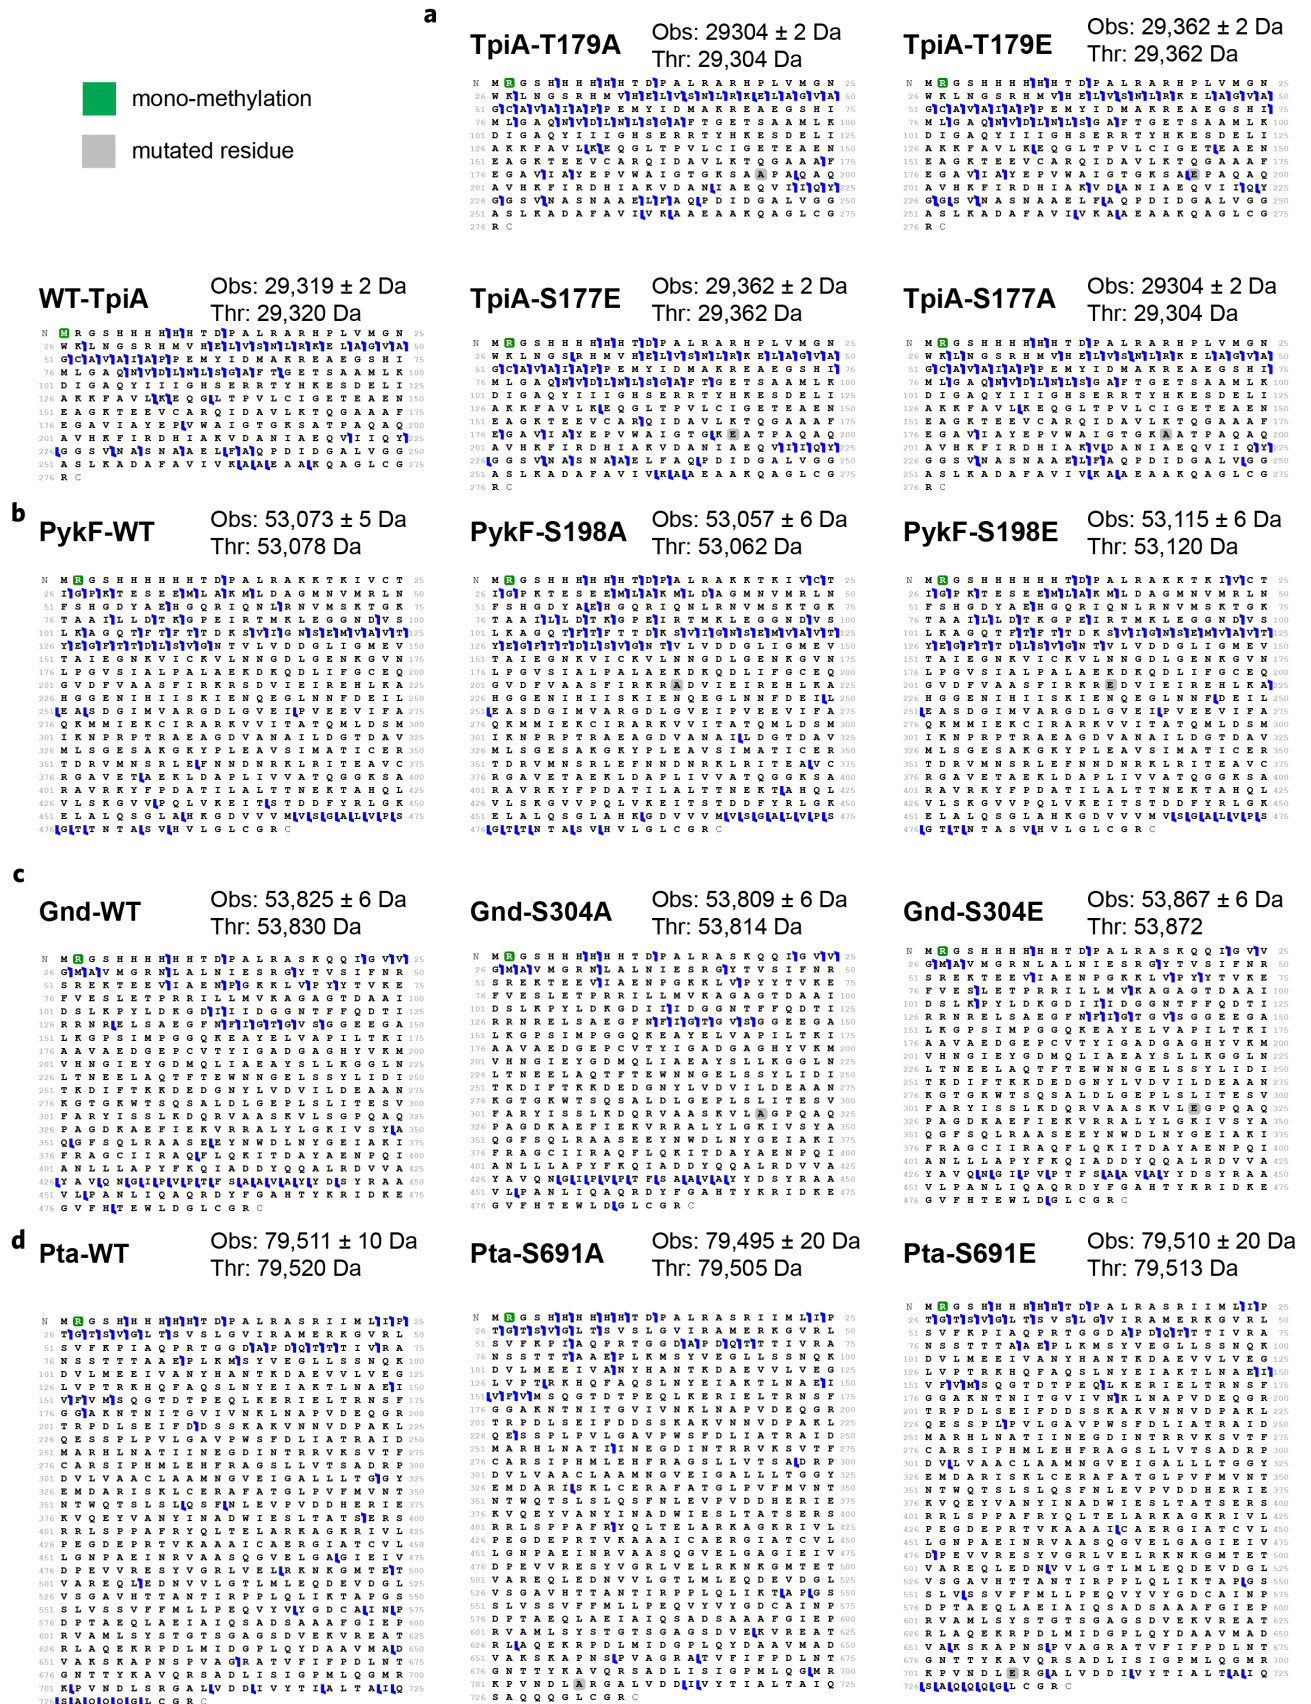

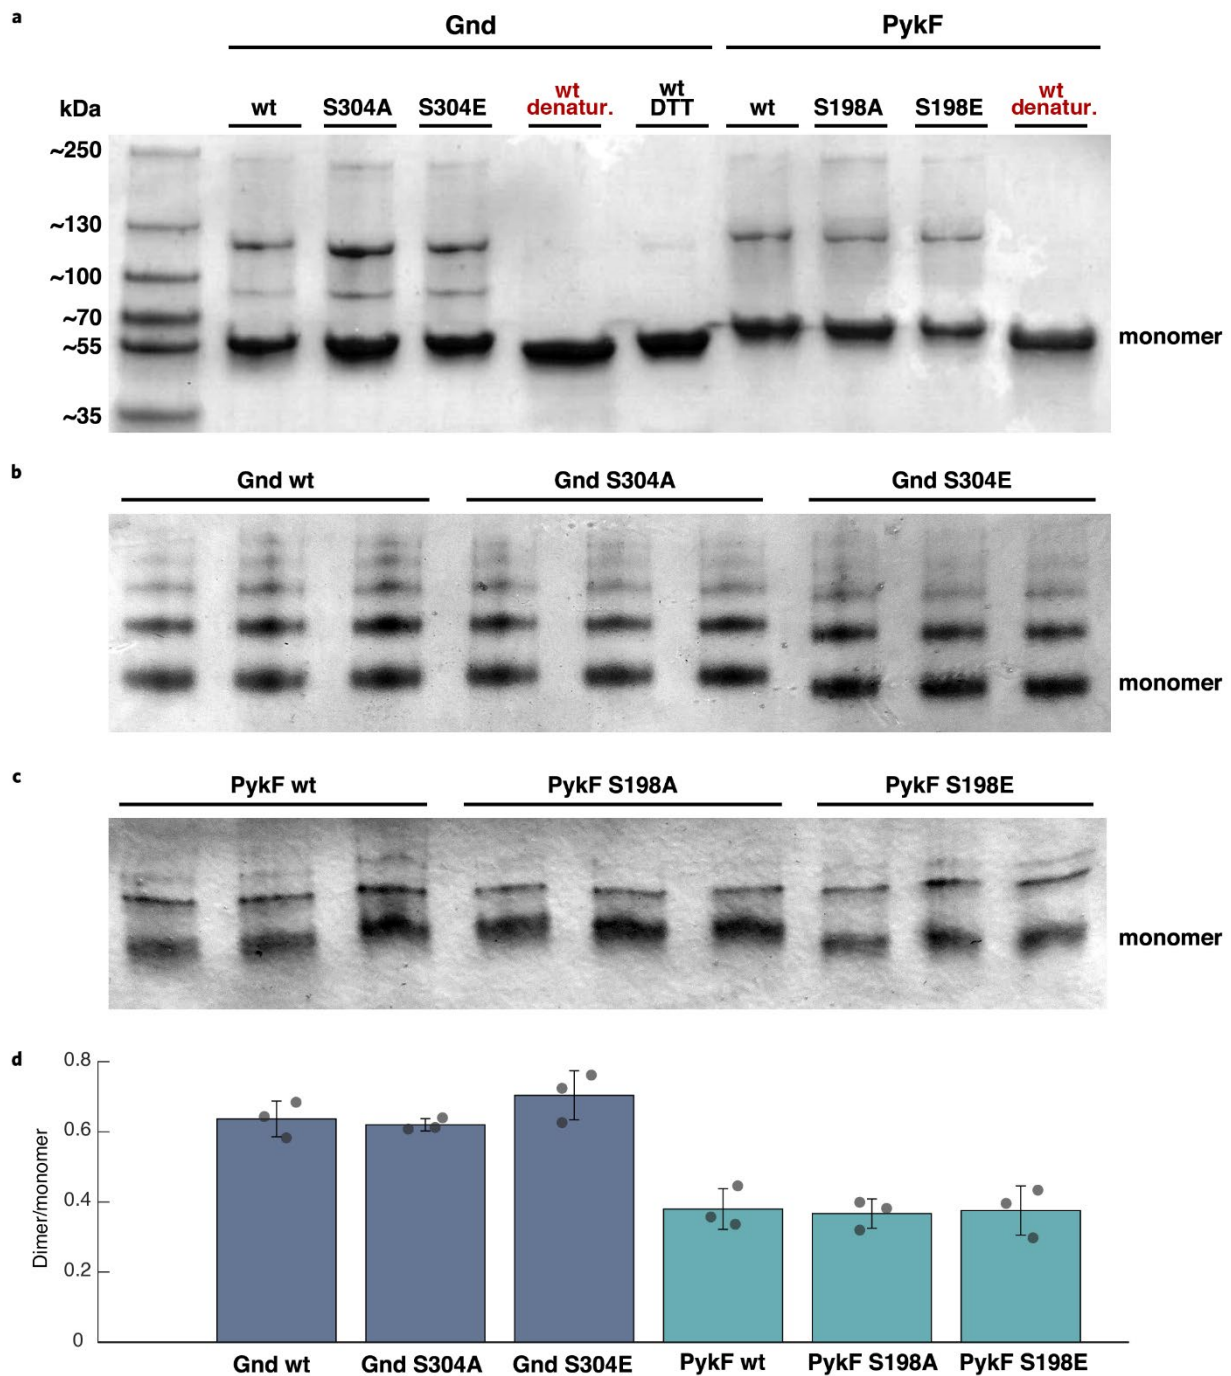

**Supplementary Figure 3 | Mono/multimer composition of purified overexpressed wild-type and phosphomutant enzymes.** **a**, SDS-PAGE of Gnd and PykF wild-type (wt) and phosphomutants in native (black) and denaturing (red) sample buffer. Samples in denaturing buffer were heated to 95 °C for 10 min. Native Gnd wt sample was additionally treated with DTT without heat treatment (wt DTT) to break down the oligomers. Similar results were obtained in two independent experiments. **b,c**, Native PAGE of Gnd and PykF wt and phosphomutants in native sample buffer. The purity and composition of the samples was previously confirmed by SDS-PAGE (**a**), samples were run in triplicates. **d**, Dimer/monomer ratio in native conditions estimated via densitometry. Data represent the mean ± standard deviation, and individual replicates (3) are shown. Source data are provided as a Source Data file.
