# Supplementary material for: Extensive regulation of enzyme activity by phosphorylation in Escherichia coli
Source: PubMed Central journal article supplement (PMC8463566; doi:10.1038/s41467-021-25988-4), 2021-09-24
Supplement: 41467_2021_25988_MOESM3_ESM.pdf [file 41467_2021_25988_MOESM3_ESM.pdf]

## Description of Additional Supplementary Information File

**File name:** Supplementary data 1

**Description:** Phosphomutant strains

**File name:** Supplementary data 2

**Description:** Growth rates of phosphomutant and knockout strains

**File name:** Supplementary data 3

**Description:** Changes in metabolites for phosphomutant and knockout strains

**File name:** Supplementary data 4

**Description:** Local metabolic changes

**File name:** Supplementary data 5

**Description:** Spearman correlation of metabolic profiles

**File name:** Supplementary data 6

**Description:** Melting temperatures of purified enzymes

**File name:** Supplementary data 7

**Description:** *In vitro* activity of phosphomutants enzymes

**File name:** Supplementary data 8

**Description:** Oligonucleotides used to create genomic phosphomutants and mutant ASKA plasmids
